# Supplementary material
Source: publisher site journal article supplement (https://www.dovepress.com/article/181922)
Supplement: Supplementary file 1 [file get_supplementary_file.php]

**Table S1: Detailed information of the selected six SNPs in DNA repair genes and *ABCG2* gene**

| <b>Genes</b> | <b>Full name</b>                             | <b>SNP</b> | <b>Base change</b> | <b>SNP location</b> |
|--------------|----------------------------------------------|------------|--------------------|---------------------|
| <i>XPA</i>   | Xeroderma pigmentosus group A                | rs10817938 | T>C                | Promoter            |
| <i>XPA</i>   | Xeroderma pigmentosus group A                | rs2808668  | C>T                | Intron              |
| <i>XPC</i>   | Xeroderma pigmentosus group C                | rs2607775  | C>G                | Exon, K939Q         |
| <i>WRN</i>   | Werner syndrome                              | rs1346044  | C>A                | Exon, Cys1367Arg    |
| <i>ABCG2</i> | ATP-binding cassette, sub-family G, member 2 | rs2231142  | C>A                | Exon, Q141K         |
| <i>ABCG2</i> | ATP-binding cassette, sub-family G, member 2 | rs2622621  | C>G                | Exon                |

**Table S2: Baseline characteristic in colorectal cancer patients (n=580)**

| <b>Variables</b>                             | <b>No.</b> | <b>%</b> |
|----------------------------------------------|------------|----------|
| <b>Total no.</b>                             | 580        | 100      |
| <b>Mean age (range), yrs</b>                 | 59 (21-82) | -        |
| <b>Mean body weight (SD), kg</b>             | 61 (8.23)  | -        |
| <b>Age at diagnosis, yrs</b>                 |            |          |
| <59                                          | 282        | 48.6     |
| ≥59                                          | 298        | 51.4     |
| <b>BMI (kg/m<sup>2</sup>)</b>                |            |          |
| <25                                          | 317        | 54.7     |
| ≥25                                          | 263        | 45.3     |
| <b>Gender</b>                                |            |          |
| Male                                         | 351        | 60.5     |
| Female                                       | 229        | 39.5     |
| <b>First-degree family history of cancer</b> |            |          |
| No                                           | 500        | 86.2     |
| Yes                                          | 80         | 13.8     |
| <b>Smoking status</b>                        |            |          |
| Ever                                         | 485        | 83.6     |
| Never #                                      | 95         | 16.4     |
| <b>Prime cancer</b>                          |            |          |
| Colon cancer                                 | 336        | 57.9     |
| Rectum cancer                                | 244        | 42.1     |
| <b>Tumor size (cm)</b>                       |            |          |
| ≤ 4.0                                        | 120        | 20.7     |
| >4.0                                         | 460        | 79.3     |
| <b>Tumor differentiation</b>                 |            |          |
| Grade 2 (G2, moderate)                       | 57         | 9.8      |
| Grade 3 (G3, poor)                           | 523        | 90.2     |
| <b>Clinical Stage</b>                        |            |          |
| III                                          | 507        | 12.6     |
| IV                                           | 73         | 87.4     |
| <b>Lymph node metastases</b>                 |            |          |
| No                                           | 23         | 4.0      |
| Yes                                          | 557        | 96.0     |
| <b>Serum tumor markers</b>                   |            |          |
| <b>B-mg</b>                                  |            |          |
| Normal                                       | 327        | 56.4     |
| Elevated                                     | 251        | 43.3     |
| <b>AFP</b>                                   |            |          |
| Normal                                       | 514        | 88.6     |
| Elevated                                     | 66         | 11.4     |
| <b>CEA</b>                                   |            |          |
| Normal                                       | 277        | 47.8     |
| Elevated                                     | 295        | 50.9     |
| <b>CA12-5</b>                                |            |          |
| Normal                                       | 308        | 53.1     |
| Elevated                                     | 270        | 46.6     |
| <b>CA15-3</b>                                |            |          |
| Normal                                       | 325        | 56.0     |
| Elevated                                     | 255        | 46.6     |
| <b>CA19-9</b>                                |            |          |
| Normal                                       | 277        | 47.8     |
| Elevated                                     | 295        | 50.9     |
| <b>Chemotherapy regimens<sup>§</sup></b>     |            |          |
| FOLFOX regimen                               | 464        | 80.0     |
| XELOX regimen                                | 116        | 20.0     |

# Defined as <100 cigarettes in lifetime.

§ Chemotherapy regimens include FOLFOX (Oxaliplatin, 5-Fluorouracil [5-FU], and Folinic acid,) and XELOX (Oxaliplatin and Capecitabine)



|                              |           |          |       |                 |           |           |              |                        |           |           |              |                        |
|------------------------------|-----------|----------|-------|-----------------|-----------|-----------|--------------|------------------------|-----------|-----------|--------------|------------------------|
| Ever                         | 304(78.1) | 85(21.9) |       | 1.00            | 187(48.1) | 202(51.9) |              | 1.00                   | 177(45.5) | 212(54.5) |              | 1.00                   |
| Never                        | 54(72.0)  | 21(28.0) | 0.167 | 0.67(0.38-1.18) | 31(41.3)  | 44(58.7)  | 0.325        | 0.76(0.47-1.29)        | 27(36.0)  | 48(64.0)  | 0.083        | 0.63(0.38-1.06)        |
| <b>Prime cancer</b>          |           |          |       |                 |           |           |              |                        |           |           |              |                        |
| Rectum                       | 215(78.8) | 58(21.2) |       | 1.00            | 130(47.6) | 143(52.4) |              | 1.00                   | 124(45.4) | 149(54.6) |              | 1.00                   |
| Colon                        | 143(74.9) | 48(25.1) | 0.214 | 0.75(0.48-1.18) | 88(46.1)  | 103(53.9) | 0.821        | 0.96(0.66-1.39)        | 80(41.9)  | 111(58.1) | 0.452        | 0.87(0.59-1.26)        |
| <b>Tumor size (cm)</b>       |           |          |       |                 |           |           |              |                        |           |           |              |                        |
| ≤ 4.0                        | 77(71.3)  | 31(28.7) |       | 1.00            | 45(41.7)  | 63(58.3)  |              | 1.00                   | 56(51.9)  | 52(48.1)  |              | 1.00                   |
| >4.0                         | 281(78.9) | 75(21.1) | 0.106 | 1.50(0.92-2.45) | 173(48.6) | 183(51.4) | 0.199        | 1.33(0.86-2.06)        | 148(41.6) | 208(58.4) | 0.063        | 0.66(0.43-1.02)        |
| <b>Lymph node metastases</b> |           |          |       |                 |           |           |              |                        |           |           |              |                        |
| No                           | 144(78.7) | 39(21.3) |       | 1.00            | 74(40.4)  | 109(59.6) |              | 1.00                   | 91(49.7)  | 92(50.3)  |              | 1.00                   |
| Yes                          | 214(76.2) | 67(23.8) | 0.452 | 0.84(0.53-1.32) | 144(51.2) | 137(48.8) | <b>0.028</b> | <b>1.53(1.05-2.24)</b> | 113(40.2) | 168(59.8) | <b>0.036</b> | <b>0.67(0.45-0.97)</b> |

#*P* value and §adjusted OR were obtained from Multinomial-logistic regression analysis adjusted for gender, age at diagnosis, body weight, smoking status.

**Table S4: Association between candidate SNPs and serum tumor markers in the colorectal cancer patients treated with FOLFOX regimen (n=464)**

| Variables                 | XPA rs10817938 |               |       |                       | XPA rs2808668   |               |       |                       | XPC rs2607775   |               |       |                       |
|---------------------------|----------------|---------------|-------|-----------------------|-----------------|---------------|-------|-----------------------|-----------------|---------------|-------|-----------------------|
|                           | TT No. (%)     | CT/CC No. (%) | P#    | Adjusted OR (95%CI) § | CC No. (%)      | CT/TT No. (%) | P#    | Adjusted OR (95%CI) § | CC No. (%)      | CG/GG No. (%) | P#    | Adjusted OR (95%CI) § |
| <b>B-mg</b>               |                |               |       |                       |                 |               |       |                       |                 |               |       |                       |
| Normal                    | 140(54.7)      | 116(45.3)     |       | 1.00                  | 60(23.4)        | 196(76.6)     |       | 1.00                  | 68(26.6)        | 188(73.4)     |       | 1.00                  |
| Elevated                  | 110(52.9)      | 98(47.1)      | 0.648 | 0.92(0.63-1.33)       | 52(25.0)        | 156(75.0)     | 0.600 | 1.12(0.73-1.73)       | 68(32.7)        | 140(67.3)     | 0.184 | 1.32(0.88-1.97)       |
| <b>AFP</b>                |                |               |       |                       |                 |               |       |                       |                 |               |       |                       |
| Normal                    | 227(55.1)      | 185(44.9)     |       | 1.00                  | 101(24.5)       | 311(75.5)     |       | 1.00                  | 122(29.6)       | 290(70.4)     |       | 1.00                  |
| Elevated                  | 23(44.2)       | 29(55.8)      | 0.158 | 0.66(0.36-1.18)       | 11(21.2)        | 41(78.8)      | 0.609 | 0.83(0.41-1.69)       | 14(26.9)        | 38(73.1)      | 0.652 | 0.86(0.45-1.65)       |
| <b>CEA</b>                |                |               |       |                       |                 |               |       |                       |                 |               |       |                       |
| Normal                    | 129(57.6)      | 95(42.4)      |       | 1.00                  | 50(22.3)        | 174(77.7)     |       | 1.00                  | 60(26.8)        | 164(73.2)     |       | 1.00                  |
| Elevated                  | 121(50.4)      | 119(49.6)     | 0.088 | 0.72(0.50-1.05)       | 62(25.8)        | 178(74.2)     | 0.316 | 1.25(0.81-1.92)       | 76(31.7)        | 164(68.3)     | 0.273 | 1.25(0.84-1.88)       |
| <b>CA12-5</b>             |                |               |       |                       |                 |               |       |                       |                 |               |       |                       |
| Normal                    | 142(56.3)      | 110(43.7)     |       | 1.00                  | 55(21.8)        | 197(78.2)     |       | 1.00                  | 70(27.8)        | 182(72.2)     |       | 1.00                  |
| Elevated                  | 108(50.9)      | 104(49.1)     | 0.207 | 0.79(0.54-1.14)       | 57(26.9)        | 155(73.1)     | 0.176 | 1.34(0.88-2.07)       | 66(31.1)        | 146(68.9)     | 0.496 | 1.15(0.77-1.72)       |
| <b>CA15-3</b>             |                |               |       |                       |                 |               |       |                       |                 |               |       |                       |
| Normal                    | 150(56.2)      | 117(43.8)     |       | 1.00                  | 58(21.7)        | 209(78.3)     |       | 1.00                  | 72(27.0)        | 195(73.0)     |       | 1.00                  |
| Elevated                  | 100(50.8)      | 97(49.2)      | 0.227 | 0.80(0.55-1.15)       | 54(27.4)        | 143(72.6)     | 0.140 | 1.38(0.90-2.13)       | 64(32.5)        | 133(67.5)     | 0.230 | 1.28(0.86-1.92)       |
| <b>CA19-9</b>             |                |               |       |                       |                 |               |       |                       |                 |               |       |                       |
| Normal                    | 126(56.5)      | 97(43.5)      |       | 1.00                  | 51(22.9)        | 172(77.1)     |       | 1.00                  | 59(26.5)        | 164(73.5)     |       | 1.00                  |
| Elevated                  | 124(51.5)      | 117(48.5)     | 0.201 | 0.79(0.54-1.14)       | 61(25.3)        | 180(74.7)     | 0.433 | 1.19(0.77-1.83)       | 77(32.0)        | 164(68.0)     | 0.222 | 1.29(0.86-1.93)       |
| <b>Continued Table S4</b> |                |               |       |                       |                 |               |       |                       |                 |               |       |                       |
| Variables                 | WRN rs1346044  |               |       |                       | ABCG2 rs2231142 |               |       |                       | ABCG2 rs2622621 |               |       |                       |
|                           | CC No. (%)     | CA/AA No. (%) | P#    | Adjusted OR (95%CI) § | CC No. (%)      | CA/AA No. (%) | P#    | Adjusted OR (95%CI) § | CC No. (%)      | CG/GG No. (%) | P#    | Adjusted OR (95%CI) § |
| <b>B-mg</b>               |                |               |       |                       |                 |               |       |                       |                 |               |       |                       |
| Normal                    | 195(76.2)      | 61(23.8)      |       | 1.00                  | 132(51.6)       | 124(48.4)     |       | 1.00                  | 111(43.4)       | 145(56.6)     |       | 1.00                  |
| Elevated                  | 163(78.4)      | 45(21.6)      | 0.495 | 1.17(0.75-1.81)       | 86(41.3)        | 122(58.7)     | 0.260 | 0.66(0.45-0.95)       | 93(44.7)        | 115(55.3)     | 0.688 | 1.08(0.74-1.57)       |
| <b>AFP</b>                |                |               |       |                       |                 |               |       |                       |                 |               |       |                       |
| Normal                    | 319(77.4)      | 93(22.6)      |       | 1.00                  | 195(47.3)       | 217(52.7)     |       | 1.00                  | 188(45.6)       | 224(54.4)     |       | 1.00                  |
| Elevated                  | 39(75.0)       | 13(25.0)      | 0.764 | 0.90(0.46-1.77)       | 23(44.2)        | 29(55.8)      | 0.690 | 0.89(0.50-1.59)       | 16(30.8)        | 36(69.2)      | 0.055 | 0.54(0.29-1.01)       |
| <b>CEA</b>                |                |               |       |                       |                 |               |       |                       |                 |               |       |                       |
| Normal                    | 177(79.0)      | 47(21.0)      |       | 1.00                  | 108(48.2)       | 116(51.8)     |       | 1.00                  | 94(42.0)        | 130(58.0)     |       | 1.00                  |
| Elevated                  | 181(75.4)      | 59(24.6)      | 0.347 | 0.81(0.52-1.26)       | 110(45.8)       | 130(54.2)     | 0.580 | 0.90(0.62-1.30)       | 110(45.8)       | 130(54.2)     | 0.403 | 1.17(0.81-1.70)       |
| <b>CA12-5</b>             |                |               |       |                       |                 |               |       |                       |                 |               |       |                       |
| Normal                    | 201(79.8)      | 51(20.2)      |       | 1.00                  | 126(50.0)       | 126(50.0)     |       | 1.00                  | 108(42.9)       | 144(57.1)     |       | 1.00                  |
| Elevated                  | 157(74.1)      | 55(25.9)      | 0.166 | 0.73(0.47-1.14)       | 92(43.4)        | 120(56.6)     | 0.180 | 0.78(0.54-1.12)       | 96(45.3)        | 116(54.7)     | 0.518 | 1.13(0.78-1.64)       |
| <b>CA15-3</b>             |                |               |       |                       |                 |               |       |                       |                 |               |       |                       |
| Normal                    | 214(80.1)      | 53(19.9)      |       | 1.00                  | 133(49.8)       | 134(50.2)     |       | 1.00                  | 115(43.1)       | 152(56.9)     |       | 1.00                  |
| Elevated                  | 144(73.1)      | 53(26.9)      | 0.086 | 0.68(0.44-1.06)       | 85(43.1)        | 112(56.9)     | 0.183 | 0.78(0.53-1.13)       | 89(45.2)        | 108(54.8)     | 0.556 | 1.12(0.77-1.63)       |
| <b>CA19-9</b>             |                |               |       |                       |                 |               |       |                       |                 |               |       |                       |
| Normal                    | 175(78.5)      | 48(21.5)      |       | 1.00                  | 107(48.0)       | 116(52.0)     |       | 1.00                  | 95(42.6)        | 128(57.4)     |       | 1.00                  |
| Elevated                  | 183(75.9)      | 58(24.1)      | 0.511 | 0.86(0.56-1.34)       | 111(46.1)       | 130(53.9)     | 0.624 | 0.91(0.63-1.32)       | 109(45.2)       | 132(54.8)     | 0.569 | 1.11(0.77-1.62)       |

#P value and §adjusted OR were obtained from Multinomial-logistic regression analysis adjusted for gender, age at diagnosis, body weight, smoking status.
